# Supplementary material
Source: PubMed Central journal article supplement (PMC4096235)
Supplement: NIHMS585870-supplement-01.pdf [file NIHMS585870-supplement-01.pdf]

INVENTORY OF SUPPLEMENTAL INFORMATION:

**Supplementary Figure legends**

**Figure S1. BAC fxAR121 mice express human AR protein in the CNS at levels comparable to endogenous mouse AR protein and human AR protein in the YAC AR100 mouse model. [related to Figure 1]**

**Figure S2. Male BAC fxAR121 mice exhibit muscle pathology and female BAC fxAR121 mice are normal. [related to Figure 2]**

**Figure S3. Cre-mediated reduction of hAR transgene expression in skeletal muscle does not alter endogenous mouse AR expression in BAC fxAR121 – HSA-Cre mice. [related to Figure 4]**

**Figure S4. Cre-mediated reduction of hAR transgene expression in skeletal muscle does not affect hAR expression in brain and does not prevent hAR protein aggregation in brain. [related to Figure 6]**

**Figure S5. Motor neuron axon numbers and calibers for control, BAC fxAR121, and BAC fxAR121 – HSA-Cre mice are comparable prior to onset of motor neuron degeneration. [related to Figure 7]**
